# Supplementary material
Source: PubMed Central journal article supplement (PMC3511107)
Supplement: 1213609109_pnas.201213609SI.pdf [file 1213609109_pnas.201213609SI.pdf]

# Supporting Information

Kitahara et al. 10.1073/pnas.1213609109

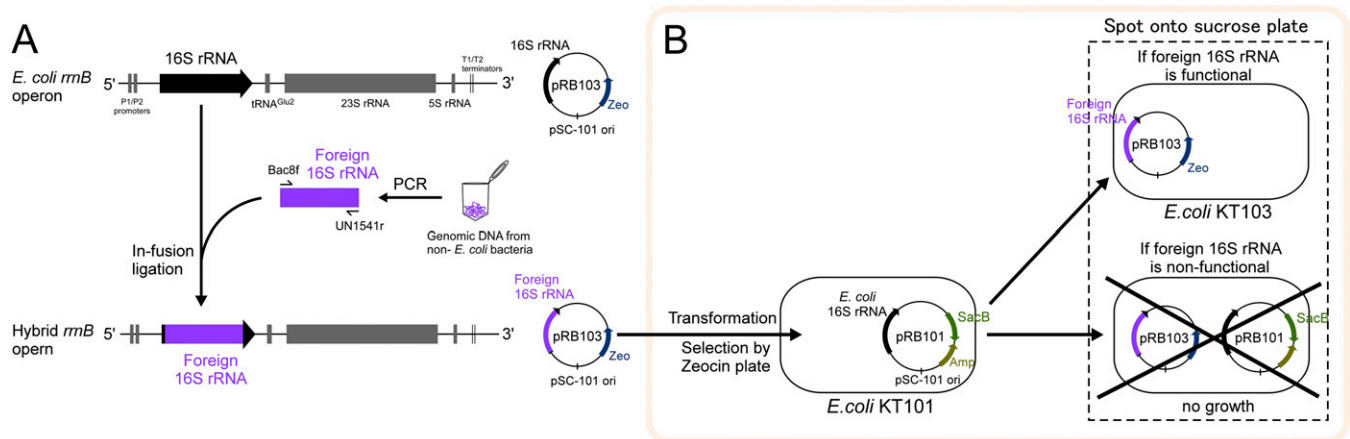

**Fig. S1.** Functionality test of metagenomically retrieved foreign 16S rRNA. (A) In-fusion cloning scheme of foreign 16S rRNA genes into an expression vector pRB103 containing the entire *rmB* operon. The *Escherichia coli* 16S rRNA gene in pRB103 was substituted with foreign 16S rRNA genes amplified from the environmental DNA (metagenome). (B) A genetic method to test the functionality of foreign 16S rRNA genes. *E. coli*  $\Delta 7$  strain KT101 was used to screen for foreign 16S rRNA genes compatible with an *E. coli* genetic background.

## 16S rRNA gene (*E. coli* numbering)

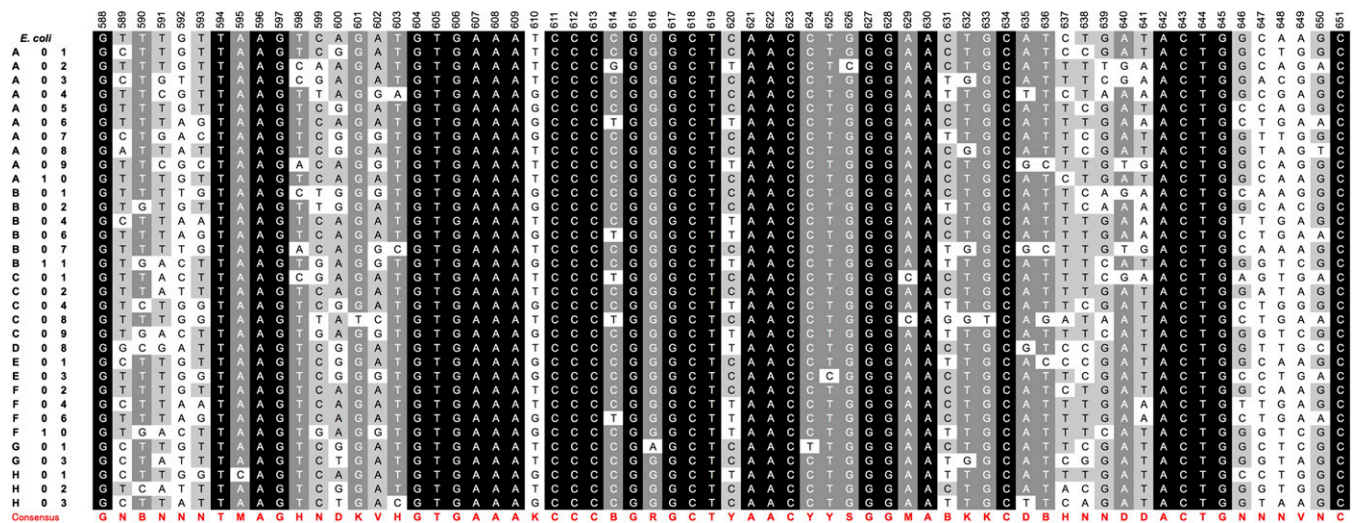

**Fig. S2.** Multiple alignment of the h21 region (G588–C651) of the 16S rRNA genes obtained from the environmental metagenome. The residues conserved in all of the sequences are shaded in black, those conserved in 80% of the sequences are in dark gray, and those conserved in 60% are in light gray. The consensus sequence is shown in red at the bottom of the alignment.

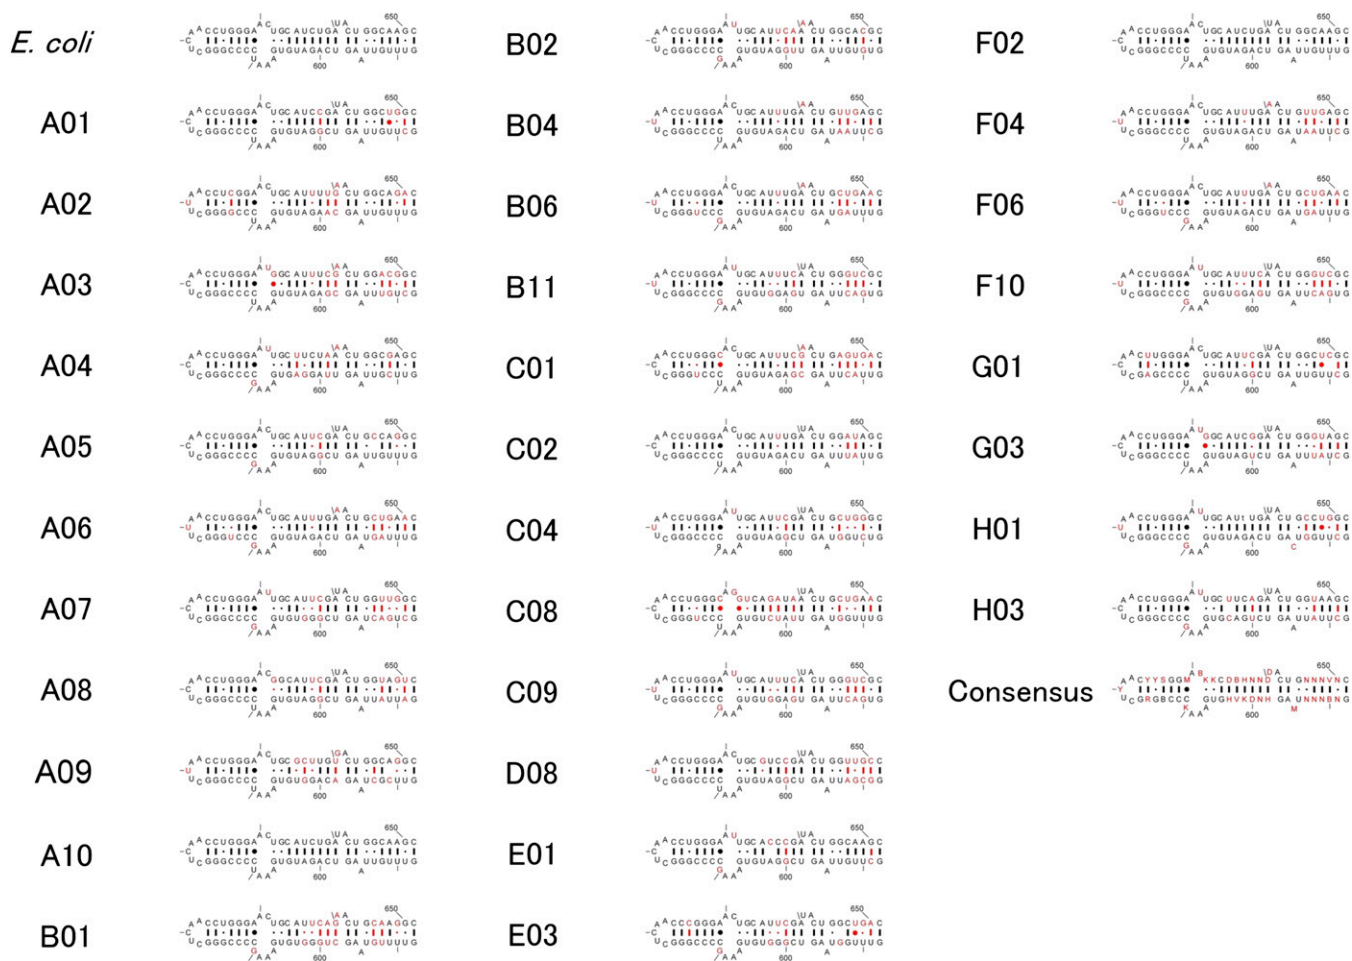

Fig. S3. Conserved nature of the secondary structure of h21 of the 16S rRNA obtained from the environmental metagenome.
